# Supplementary material for: How Are Mixed‐Phase Clouds Mixed?
Source: PubMed Central journal article supplement — Geophys Res Lett. 2022 Sep 16;49(18):e2022GL099578. doi: 10.1029/2022GL099578 (PMC9540255; doi:10.1029/2022gl099578), 2022-09-16
Supplement: GRL-49-e2022GL099578-s001.pdf [file GRL-49-e2022GL099578-s001.pdf]

**How are mixed-phase clouds mixed?**

Alexei Korolev<sup>1</sup> and Jason Milbrandt<sup>1</sup>

<sup>1</sup>Environment and Climate Change Canada

**Contents of this file:**

Table S1

Figure S1

**Table S1.** Summary of the flight campaigns

|   | project  | project dates     | operation base  | Lat/Lon                  | Number of flights |
|---|----------|-------------------|-----------------|--------------------------|-------------------|
| 1 | BASE     | Sep-Oct/1994      | Inuvik (NT)     | 57°N–74°N<br>113°W–141°W | 12                |
| 2 | CFDE 1   | Feb-Mar/1995      | St. John's (NL) | 45°N–53°N<br>54°W–63°W   | 12                |
| 3 | CFDE 3   | Dec/1997-Feb/1998 | Ottawa (ON)     | 42°N–50°N<br>71°W–83°W   | 27                |
| 4 | FIRE-ACE | Apr/1998          | Inuvik (NT)     | 68°N–76°N<br>133°W–167°W | 17                |
| 5 | AIRS 1   | Dec/1999-Feb/2000 | Ottawa (ON)     | 42°N–46°N<br>74°W–82°W   | 25                |
| 6 | AIRS 1.5 | Feb/2003          | Ottawa (ON)     | 42°N–46°N<br>74°W–82°W   | 8                 |
| 7 | AIRS 2   | Nov/2003-Feb/2004 | Ottawa (ON)     | 42°N–46°N<br>74°W–82°W   | 21                |

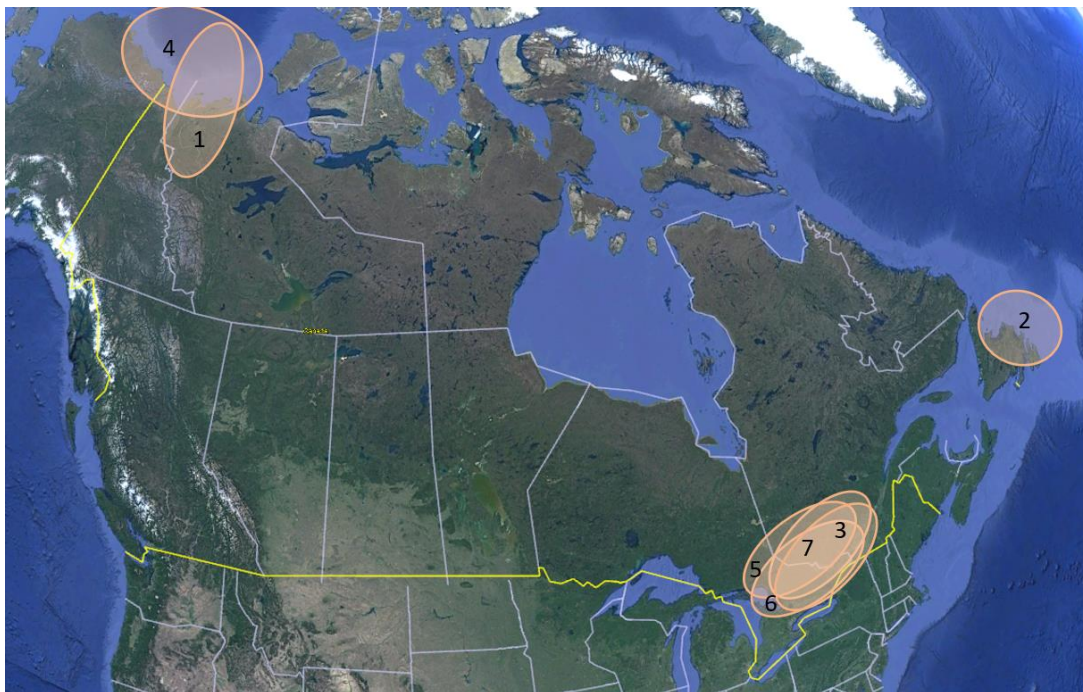

**Figure S1.** Area of operations of the NRC Convair-580 associated with the field campaigns in Table 1 are indicated by elliptical areas.
